# Supplementary material for: Early Reverse Transcription Is Essential for Productive Foamy Virus Infection
Source: PubMed Central journal article supplement (PMC2884000; doi:10.1371/journal.pone.0011023), 2010-06-11
Supplement: pone.0011023.s001.pdf [file pone.0011023.s001.pdf]

**Table S1: Primer, probe sequences and PCR and RT-PCR cycle conditions.**

| Primer or Probe | Sequence                                                     | Target                                                         |
|-----------------|--------------------------------------------------------------|----------------------------------------------------------------|
| SpuIN F         | 5'-GGACCTGTAATAGACTGGAA-3'                                   | Total viral DNA PCR size product:551bp                         |
| SpuR            | 5'-ATTTGCAGGTCTAATACTCTCC-3'                                 |                                                                |
| SpA             | 5'-TAGTATAATCATTCCGCTTTTCG-3'                                | 2 LTR circles and U5-U3 RNA<br>PCR size product: 413bp         |
| SpF             | 5'-CAATAAACCGACTTGATTGAG-3'                                  |                                                                |
| SpFL*           | 5'-GAGAGACACAAGGTTCTTAAATTGTCCTCATTTCGC-3' <sup>a</sup>      |                                                                |
| SpLC*           | 5'-ACTCCCTCTGACATCCAACGCTGGGCTAC-3' <sup>b</sup>             |                                                                |
| LambdaT-SpA     | 5'-ATGCCACGTAAGCGAAACTTAGTATAATCATTCCGCTTTTCG-3'             |                                                                |
| Alu 1           | 5'-TCCCAGCTACTGGGAGGCTGAGG-3'                                | Integrated viral DNA (first round)                             |
| Alu 2           | 5'-GCCTCCCAAAGTGCTGGGATTACAG-3'                              |                                                                |
| LambdaT         | 5'-ATGCCACGTAAGCGAAACT-3'                                    | Integrated viral DNA (second round)<br>PCR size product: 234bp |
| Nested R        | 5'-GAAACTAGGGAAAACCTAGG-3'                                   |                                                                |
| SpFL*           | 5'-GAGAGACACAAGGTTCTTAAATTGTCCTCATTTCGC-3' <sup>a</sup>      |                                                                |
| SpLC*           | 5'-ACTCCCTCTGACATCCAACGCTGGGCTAC-3' <sup>b</sup>             |                                                                |
| Spuma S         | 5'-CAAGGTTCTTAAATTGTCCTCATTC-3'                              |                                                                |
| Spuma A         | 5'-TTTCCGCTTTGGTGACCA-3'                                     | Total viral RNA<br>PCR size product: 101bp                     |
| Spuma TM*       | 5'-ACTCCCTCTGACATCCAACGCTGGGC <sub>x</sub> T-3' <sup>c</sup> |                                                                |
| CYC F           | 5'-CATCTGCACTGCCAAGACTGAG-3'                                 | Cyclophilin A                                                  |
| CYC R1          | 5'-AGGGAACAAGGAAAACATGGAA-3'                                 |                                                                |
| CYC FL*         | 5'-CCTCCACCCCATTTGCTCGCAGTA <sub>x</sub> -3' <sup>c</sup>    |                                                                |
| CYC LC*         | 5'-CCTAGAATCTTTGTGCTCTCGCTGCAGT-3' <sup>b</sup>              |                                                                |

\*: Probe sequence. A: modified probe with a 3' fluorescein. B: modified probe with LC red 640 dye at the 5' end and phosphorylated at the 3' end. C: modified probe with 6-carboxyfluorescein (FAM) at the 5' end and phosphorylated at the 3' end. X: 5-carboxytetramethylrhodamine group. Primers and probes were purchased from TIB MOLBIOL (Berlin, Germany).

| Target                              | RT         | Denaturation | PCR cycles                         |
|-------------------------------------|------------|--------------|------------------------------------|
| Total viral DNA                     | none       | 95°C 10min   | (95°C 10s, 60°C 10s, 72°C 30s)x50  |
| 2 LTR circles                       | none       | 95°C 10min   | (95°C 15s, 58°C 10s, 72°C 20s)x50  |
| Integrated viral DNA (first round)  | none       | 95°C 8min    | (95°C 10s, 60°C 10s, 72°C 170s)x15 |
| Integrated viral DNA (second round) | none       | 95°C 8min    | (95°C 10s, 63°C 10s, 72°C 8s)x50   |
| Total viral RNA                     | 61°C 25min | 95°C 4min    | (95°C 15s, 60°C 60s)x50            |
| U5-U3 RNA                           | 61°C 25min | 95°C 4min    | (95°C 1s, 58°C 10s, 72°C 20s)x50   |
| Cyclophilin A                       | 61°C 25min | 95°C 4min    | (95°C 1s, 56°C 10s, 72°C 15s)x50   |
